# Supplementary figures and images for: A novel bivalent interaction mode underlies a non-catalytic mechanism for Pin1-mediated protein kinase C regulation
Source: eLife journal article supplement (doi:10.7554/elife.92884), 2024-04-09

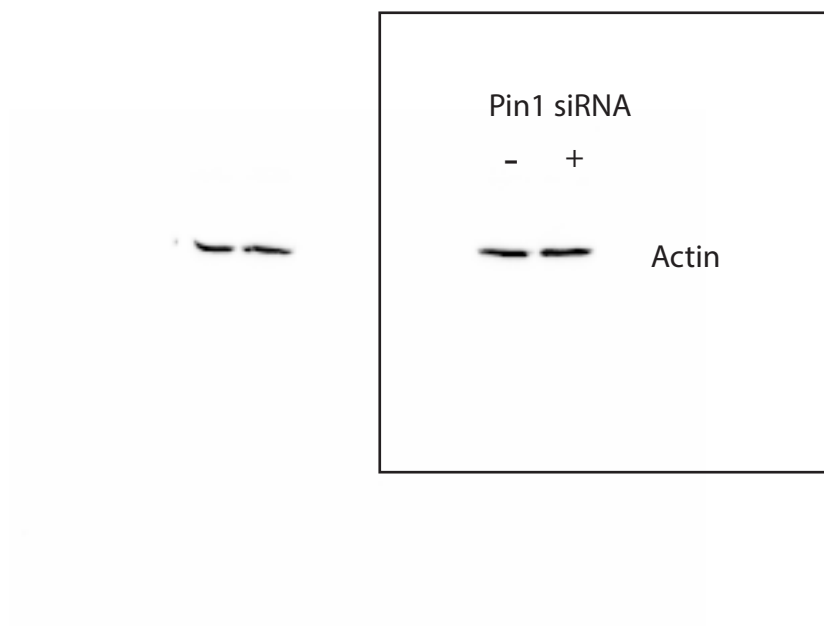

Supplement: fig7-figsupp1-data1 [file elife-92884-fig7-figsupp1-data1-v1.zip]

Pin1 siRNA

- +

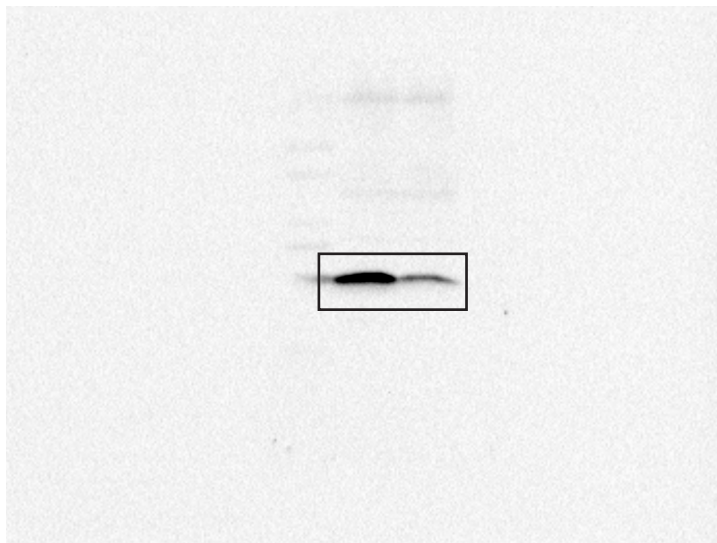

Pin1

Supplement: fig7-figsupp1-data1 [file elife-92884-fig7-figsupp1-data1-v1.zip]

Pin1 siRNA

- +

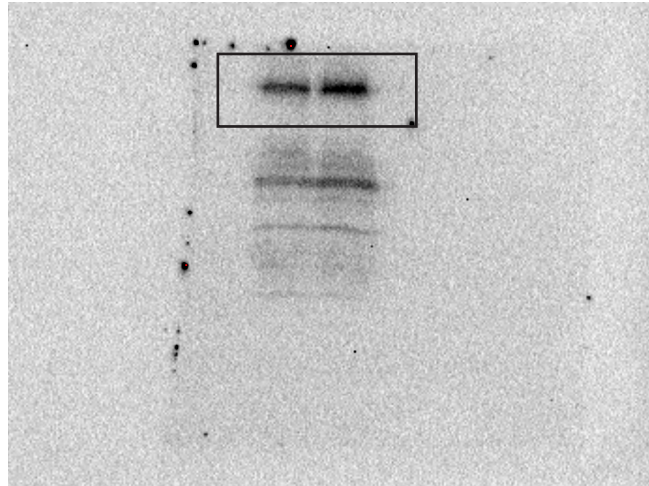

PKC $\alpha$

Supplement: fig7-figsupp1-data1 [file elife-92884-fig7-figsupp1-data1-v1.zip]
